# Supplementary material for: Phylogenomic approaches to detecting and characterizing introgression
Source: PubMed Central journal article supplement (PMC9208645; doi:10.1093/genetics/iyab173), 2021-11-11
Supplement: iyab173_supplementary_data.pdf [file iyab173_supplementary_data.pdf]

## Supplementary Materials and Methods for Hibbins & Hahn 2021

### *Simulation study under different introgression scenarios*

To illuminate many of the patterns and approaches discussed in this review, we conducted a small simulation study. We used the five introgression scenarios shown in Figure 2, as well as one scenario with only ILS and several additional scenarios involving ghost introgression (Supplementary Figure 2). Introgression was simulated in *ms* by specifying an instantaneous population split and join event; this is equivalent to simulating under the multispecies network coalescent framework (Hibbins and Hahn 2019). For each set of conditions, we performed 100 replicate simulations each consisting of 3000 gene trees with branch lengths. We evaluated the performance of three different test statistics designed to capture slightly different information about introgression:  $D$ ,  $D_3$ , and  $\Delta$ . In addition, we applied the InferNetwork\_ML method (Yu et al. 2014) in *PhyloNet*, which infers a phylogenetic network using maximum-likelihood. For the three test statistics, we evaluated significance by bootstrap-resampling the gene trees in each dataset to estimate the sampling variance. The  $z$ -score obtained from bootstrap-resampling was used to estimate a two-tailed  $p$ -value. The method we use in *PhyloNet* evaluates the fit of a phylogenetic network internally (Yu et al. 2012) using a combination of the model selection measures AIC (Akaike 1974), AICc (Burnham and Anderson 2002), and BIC (Schwarz 1978). For our purposes, a positive result was taken as any result where *PhyloNet* selected a network over a strictly bifurcating tree. See Supplementary Table 1 for the simulation parameters used for each condition.

The power of each method to detect introgression under each scenario is shown in Supplementary Figure 3. All four methods yielded low false positive rates in the presence of high ILS but no introgression, confirming that they are effective tests against an ILS-only null hypothesis. For non-sister taxa, *PhyloNet* was always capable of identifying introgression, while the power of the other methods was strongly affected by the direction of introgression. A reduction of power for  $P1 \rightarrow P3$  introgression is consistent with the effect of direction on gene tree branch lengths described above, but the magnitude of the reduction is somewhat surprising: there is almost three times as much power to detect  $P3 \rightarrow P1$  introgression. Of the four methods, only *PhyloNet* appears capable of reliably inferring introgression between sister lineages, again consistent with expectations.

The  $D$  and  $\Delta$  statistics, as well as *PhyloNet*, did not give significant results when introgression occurred between  $P1$  and an unsampled ingroup lineage. The  $D_3$  statistic, interestingly, does appear to be sensitive to this scenario, at least when the ghost population is the donor. This suggests that patterns of pairwise divergence may be especially useful for detecting introgression with unsampled populations. When introgression occurs between  $P1$  and an outgroup ghost lineage, there is no effect when the ghost is the recipient, while all four methods are strongly affected when the ghost is the donor. These observations are consistent with expectations for ghost populations, highlighting the importance of careful interpretation of the potential taxa involved in a positive result. In this case, all methods appear to suggest introgression between  $P2$  and  $P3$ , even though neither of these lineages was involved in the introgression. This occurs

41 because introgression from outside the rooted triple draws  $P1$  to the outside as well, leaving  $P3$   
42 more closely related to  $P2$ .

43 In addition to testing for the presence of introgression, we evaluated the ability of *PhyloNet* to  
44 infer the direction of introgression, and of several methods to infer the rate of introgression. We  
45 evaluated the ability of *PhyloNet* to correctly identify the taxa involved, the donor and recipient  
46 lineages, and the rate of introgression. For the two conditions involving introgression between  
47 non-sister taxa, we additionally estimated the rate of introgression using the  $D_p$  statistic and an  
48 analogous version of the  $\Delta$  statistic where the count of the concordant tree topology was added to  
49 the denominator; we refer to this statistic as  $\Delta_p$ .

50 We found that *PhyloNet* was highly accurate at identifying the taxa and direction for  $P1 \rightarrow P3$   
51 introgression (Supplementary Figure 3). However, somewhat surprisingly, it often failed to  
52 identify the taxa involved when introgression was  $P3 \rightarrow P1$  (although it always correctly  
53 identified that introgression had occurred somewhere). While it is more difficult to detect  
54 introgression in the  $P1 \rightarrow P3$  direction, once it is detected it appears that the additional signal in  
55 gene tree branch lengths makes it easier for *PhyloNet* to infer the direction. For sister lineages,  
56 *PhyloNet* always correctly identified the taxa, but cannot accurately infer the direction. However,  
57 *PhyloNet* must always specify the direction of introgression, and its behavior differs between  
58 scenarios. For introgression between extant sister species, the direction of introgression appears  
59 to be assigned randomly, while for ancestral sister species introgression is always inferred to be  
60 in one direction. For the rate of introgression, *PhyloNet* appears to slightly overestimate the true  
61 rate under all scenarios in which it correctly identified introgression (Supplementary Figure 4).  
62 By contrast,  $D_p$  and  $\Delta_p$  tend to slightly underestimate the rate of introgression between non-sister  
63 taxa (Supplementary Figure 4).

64

65

66

67

68

69

70

71

72

73

74

75

76

77

78 **Supplementary Figures and Tables**

A)

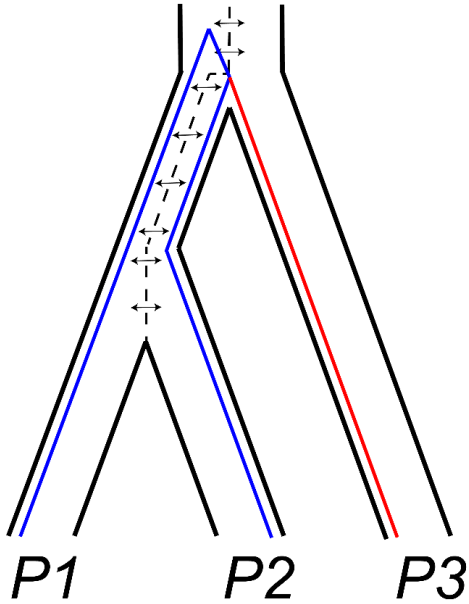

B)

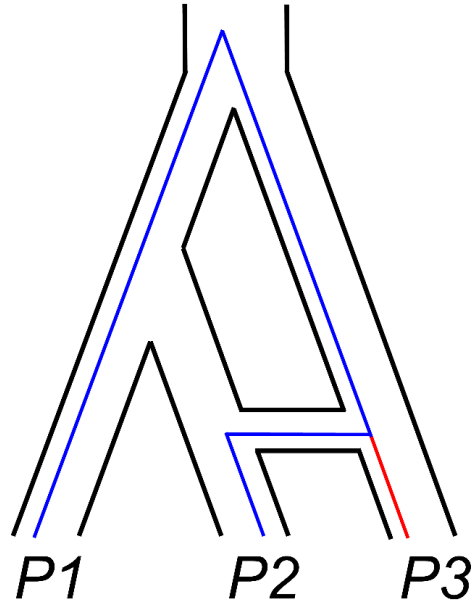

79

80 *Supplementary Figure 1: Distinguishing ancestral population structure (A) from introgression*  
81 *(B). Persistent structure in the ancestral population of a quartet, which may or may not continue*  
82 *after the first speciation event, can result in the same asymmetries in gene tree topologies and*  
83 *divergence times that are expected from introgression between non-sister taxa. These two*  
84 *scenarios are distinguishable by studying the distribution of branch lengths, in particular the*  
85 *length of the tip branch leading to P3 (red).*

86

87

88

89

90

91

92

93

94

95

96

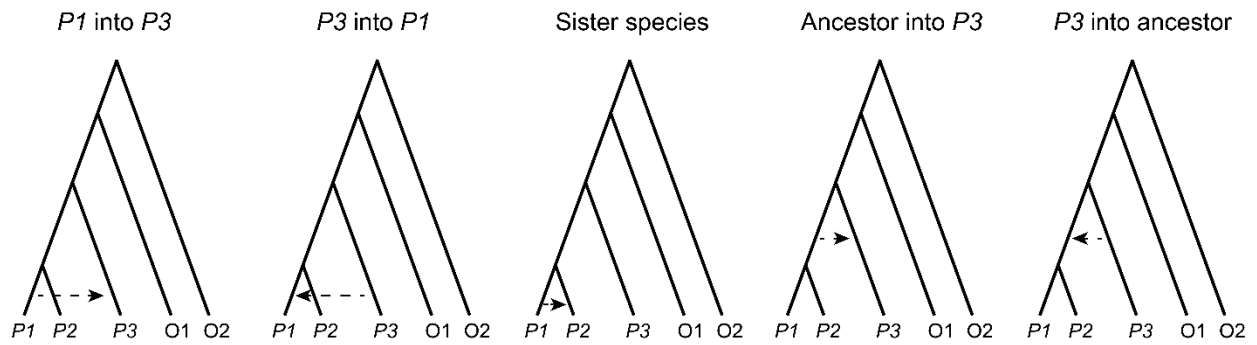

97

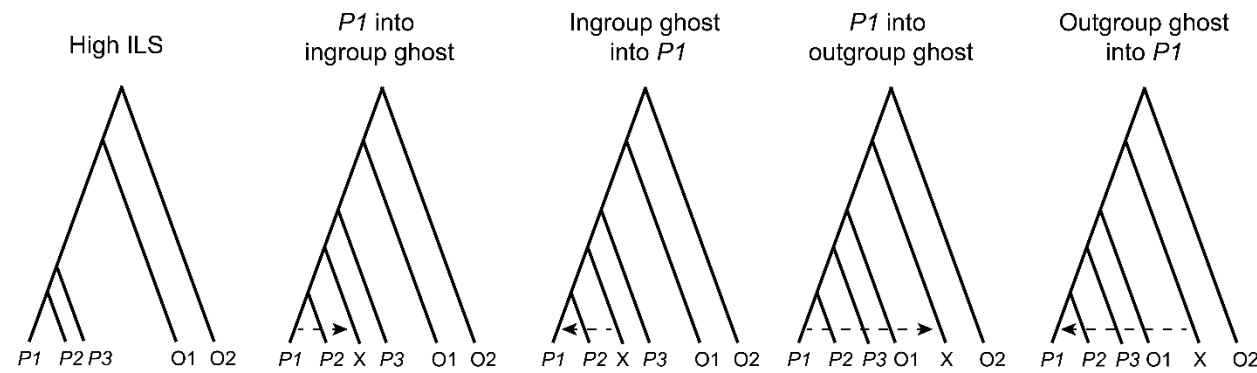

98 *Supplementary Figure 2: A visual overview of the ten different conditions used in our simulation*  
99 *study. Branch lengths are not to scale.*

100

101

102

103

104

105

106

107

108

109

110

111

112

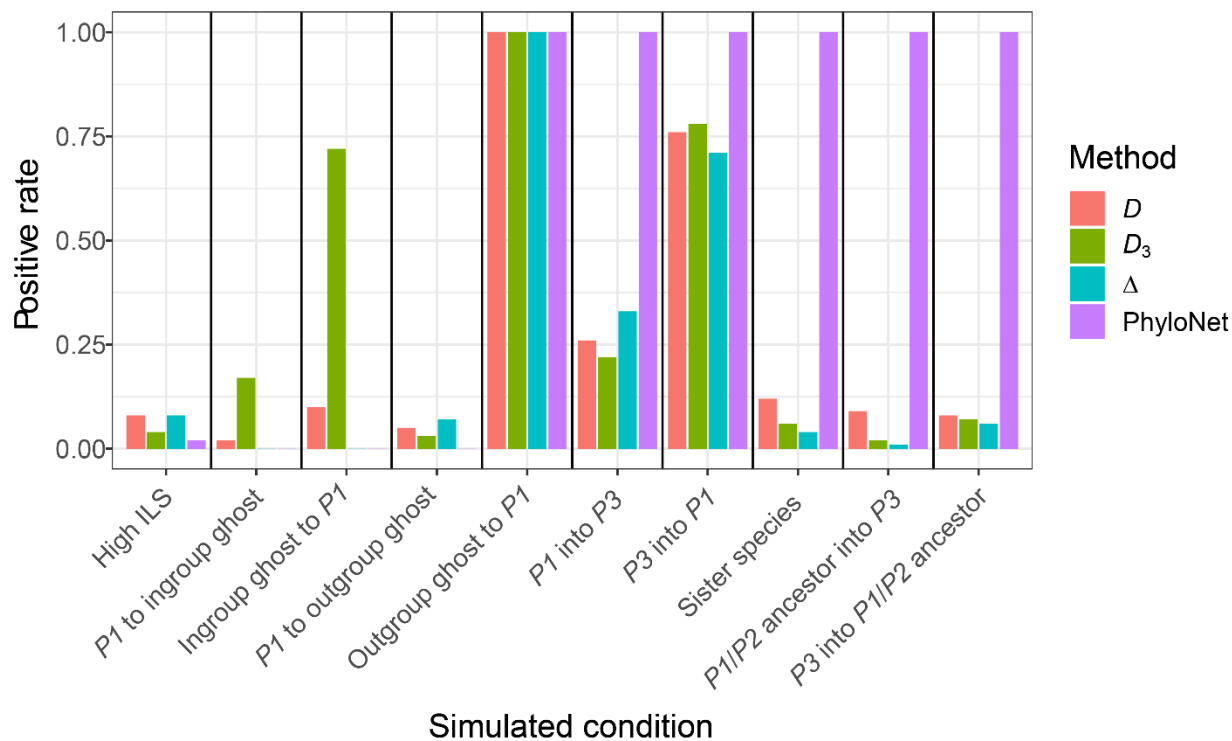

113

114 *Supplementary Figure 3: Power (y-axis) of four different methods (color legend) to infer the*  
115 *presence of introgression across ten different simulation conditions (x-axis). Power is measured*  
116 *as the proportion of tests that are significant; for the "High ILS" condition it therefore represents*  
117 *the false positive rate.*

118

119

120

121

122

123

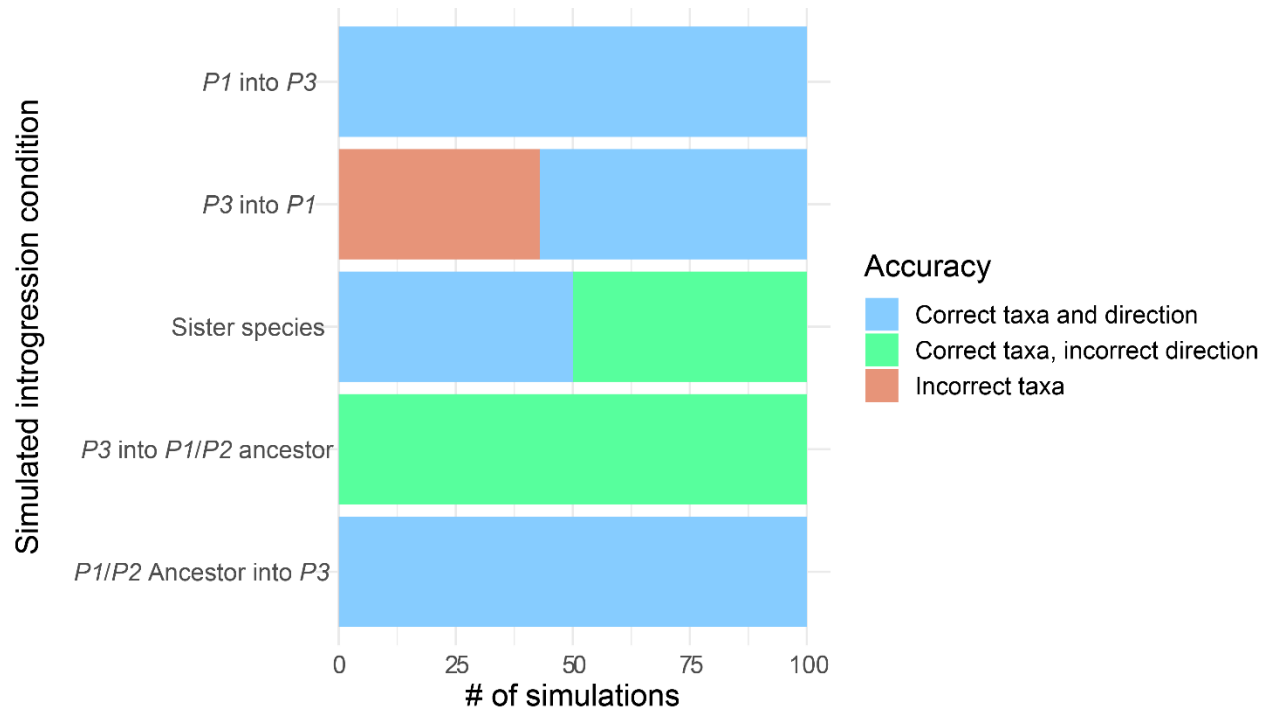

124

125 *Supplementary Figure 4: The power of PhyloNet to identify the taxa involved and direction of*  
 126 *introgression across five simulation conditions.*

127

128

129

130

131

132

133

134

135

136

137

138

139

140

141

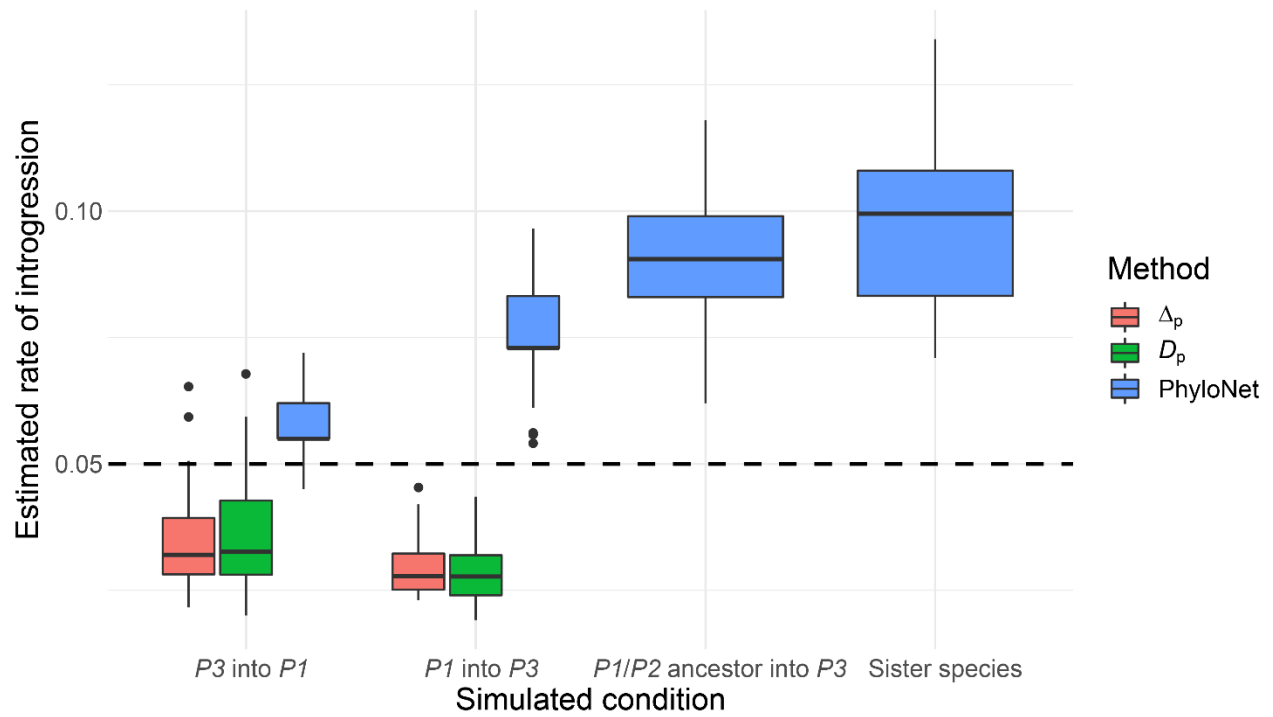

142

143 *Supplementary Figure 5: Accuracy of three methods (color legend) for estimating the rate of*  
 144 *introgression (y-axis) across four simulation conditions (x-axis). The horizontal dashed line*  
 145 *shows the true simulated rate of introgression.*

146

147

148

149

150

151

152

153

154

155

156

157

158

| Condition              | P1/P2_split | P1P2/P3_split | P1P2P3/O1_split | O1/O2_split | intro_timing | intro_rate | ghostpop_split | theta |
|------------------------|-------------|---------------|-----------------|-------------|--------------|------------|----------------|-------|
| P1 into P3             | 0.6         | 1.2           | 8               | 20          | 0.3          | 0.05       | N/A            | 0.005 |
| P3 into P1             | 0.6         | 1.2           | 8               | 20          | 0.3          | 0.05       | N/A            | 0.005 |
| Sister species         | 0.6         | 1.2           | 8               | 20          | 0.3          | 0.05       | N/A            | 0.005 |
| Ancestor into P3       | 0.6         | 1.2           | 8               | 20          | 0.9          | 0.05       | N/A            | 0.005 |
| P3 into ancestor       | 0.6         | 1.2           | 8               | 20          | 0.9          | 0.05       | N/A            | 0.005 |
| High ILS               | 0.6         | 0.62          | 8               | 20          | N/A          | 0.05       | N/A            | 0.005 |
| P1 into ingroup ghost  | 0.6         | 8             | 20              | 30          | 0.3          | 0.05       | 1.2            | 0.005 |
| Ingroup ghost into P1  | 0.6         | 8             | 20              | 30          | 0.3          | 0.05       | 1.2            | 0.005 |
| P1 into outgroup ghost | 0.6         | 1.2           | 8               | 30          | 0.3          | 0.05       | 20             | 0.005 |
| Outgroup ghost into P1 | 0.6         | 1.2           | 8               | 30          | 0.3          | 0.05       | 20             | 0.005 |

159

160 *Supplementary Table 1*: Parameters used for introgression simulation conditions in *ms*. Split  
161 times and theta are in units of  $2N$  generations.

162

163

164

165

166

167
